# Supplementary material for: Heat Shock Response in Yeast Involves Changes in Both Transcription Rates and mRNA Stabilities
Source: PLOS journal article supplement (doi:10.1371/journal.pone.0017272), 2011-02-25

Figure S2

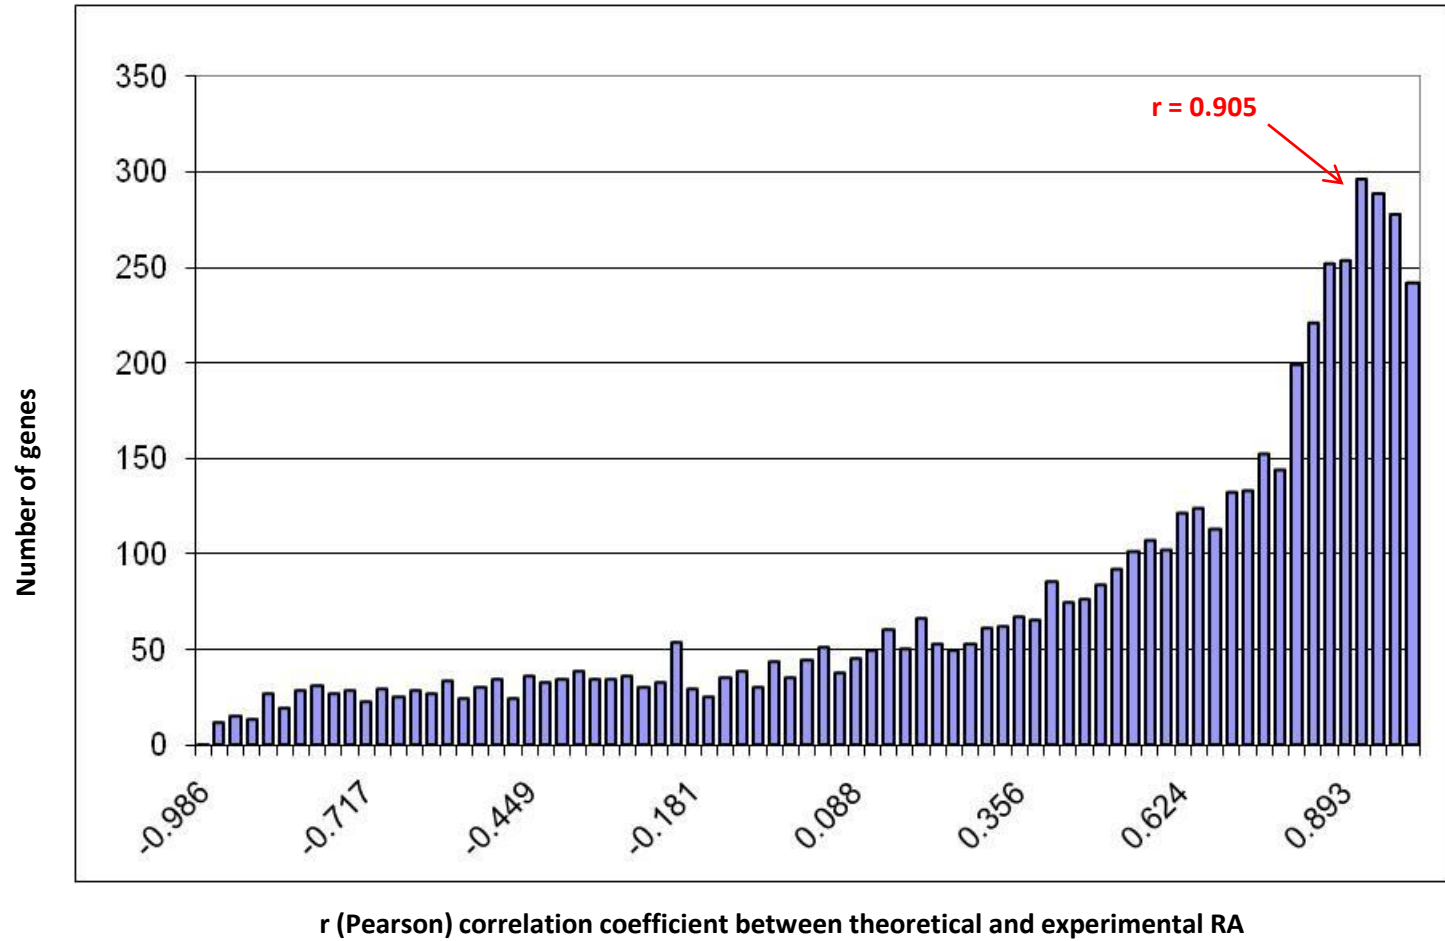

Supplement: S2 (10.1371/journal.pone.0017272.s002) [file journal.pone.0017272.s002]
