# Supplementary material for: Heat Shock Response in Yeast Involves Changes in Both Transcription Rates and mRNA Stabilities
Source: PLoS One. 2011 Feb 25;6(2):e17272. doi: 10.1371/journal.pone.0017272 (PMC3045430; doi:10.1371/journal.pone.0017272)
Supplement: Table S3 — Parameters (real RA, theoretical RA and TR) for the genes of the GO categories ‘Protein Folding’, ‘Ribosomal Protein’ and ‘rRNA Processing.’ (XLS) [file pone.0017272.s006.xls]

## Sheet: Protein Folding
Table S3. Parameters [TR, RA and theoretical (T) RA] for protein folding genes. All data are relative to the corresponding value at time 0.
Cluster 11
ORF name	Gene name	TR t0	TR t4	TR t11	TR t16	TR t26	TR t40	RA t0	RA t4	RA t11	RA t16	RA t26	RA t40	RA t0 (T)	RA t4 (T)	RA t11 (T)	RA t16 (T)	RA t26 (T)	RA t40 (T)
YEL030W	ECM10	1	1.93904	2.11321	1.3278	1.40744	1.20671	1	1.12652	1.84732	1.74813	1.84031	1.78122	1	1.05513	1.24273	1.30902	1.32498	1.31627
YML130C	ERO1	1	6.66359	10.2073	8.07073	5.78849	3.35411	1	1.75109	5.21905	8.71857	12.148	11.8311	1	1.55817	3.71706	4.96434	5.72959	5.04666
YDR518W	EUG1	1	2.98956	9.34672	7.30932	8.57559	10.0792	1	0.989003	1.51921	1.68249	2.20247	3.65021	1	1.02451	1.24432	1.46076	1.85148	2.47498
YNL281W	HCH1	1	4.25429	5.98477	4.1241	2.76147	0.708299	1	1.38453	2.99522	3.72044	4.22773	3.53476	1	1.42956	2.92772	3.55756	3.45624	2.24946
YMR161W	HLJ1	1	4.06764	6.74724	5.05781	4.0772	1.47663	1	1.83209	2.53282	3.50671	3.57915	2.89232	1	1.36807	2.88793	3.7152	4.0986	3.1893
YOR020C	HSP10	1	6.28561	7.01306	4.53923	3.96693	0.947211	1	1.42728	2.98128	4.35414	4.92621	3.45698	1	1.8065	3.99806	4.58447	4.37142	2.83354
YJL159W	HSP150	1	1.58729	2.55753	1.80889	1.50897	0.84675	1	0.886576	1.88376	2.26431	2.46105	1.90464	1	1.00722	1.05257	1.08699	1.12126	1.12556
YPL240C	HSP82	1	6.24041	6.90055	2.55444	2.78296	0.609088	1	1.24035	2.05375	1.80143	4.01141	3.4351	1	1.43637	2.80504	3.16981	2.99403	2.34466
YJL073W	JEM1	1	1.92523	5.15019	5.1481	5.20031	2.70929	1	1.41131	3.81614	5.35327	6.31423	9.61519	1	1.01527	1.15928	1.32232	1.63072	1.88429
YJL034W	KAR2	1	3.8417	4.90479	3.87923	2.49748	1.18551	1	1.37662	3.27074	4.66794	5.0502	4.95693	1	1.53618	3.08088	3.61041	3.24992	2.02508
YNL006W	LST8	1	39.035	47.8031	31.7849	13.7399	1.97122	1	7.26588	22.974	30.7924	38.7165	17.3184	1	5.60703	19.7225	25.2411	23.5672	13.5522
YOR288C	MPD1	1	3.25488	4.61184	4.01769	5.34186	4.09973	1	1.12122	2.58014	5.47883	9.56332	11.2433	1	1.22844	2.09857	2.6231	3.51102	4.11427
YOL088C	MPD2	1	1.99966	2.74256	2.2839	3.66132	2.94184	1	1.13174	1.26739	1.13489	1.78401	3.01588	1	1.04852	1.2633	1.41009	1.76319	2.21262
YCL043C	PDI1	1	1.9498	3.48772	3.00492	3.0765	1.67982	1	0.995952	1.68346	1.86334	2.01236	3.50482	1	1.03254	1.22912	1.39814	1.66248	1.81204
YBL075C	SSA3	1	10.7762	28.2571	22.1547	17.884	4.59184	1	1.78244	12.0713	25.6765	33.1052	29.0009	1	2.3518	9.77907	14.6131	17.3562	12.5758
YJR045C	SSC1	1	6.13113	7.11498	5.29255	2.62107	0.633711	1	1.36203	3.53529	3.99828	3.47648	3.1034	1	1.10422	1.48837	1.72458	1.94072	1.89546
YPL106C	SSE1	1	6.17207	5.60827	4.32395	3.03215	0.848332	1	1.22097	1.97853	2.5639	2.96909	2.35159	1	1.10486	1.43677	1.61327	1.81384	1.82727
YBR169C	SSE2	1	40.6098	41.1488	27.5839	12.647	3.55554	1	2.76771	11.1711	18.1212	17.0083	12.7528	1	5.71258	18.5331	22.81	21.1446	12.9677
YAL053W	YAL053W	1	2.39478	4.07452	2.87789	2.01533	1.2936	1	1.50448	2.3951	2.82733	2.06357	1.92751	1	1.11353	1.6766	2.02109	2.1592	1.91432
YFR041C	YFR041C	1	2.62425	4.06625	2.44187	3.30089	3.34452	1	1.17302	1.88362	1.98898	3.18272	4.53195	1	1.1133	1.6247	1.89304	2.20091	2.65143
YLR200W	YKE2	1	1.7455	2.55976	2.21144	2.42632	1.91742	1	1.22808	1.90062	1.40797	1.30784	1.89575	1	1.02029	1.12562	1.20985	1.35373	1.4966
Cluster 12
ORF name	Gene name	TR t0	TR t4	TR t11	TR t16	TR t26	TR t40	RA t0	RA t4	RA t11	RA t16	RA t26	RA t40	RA t0 (T)	RA t4 (T)	RA t11 (T)	RA t16 (T)	RA t26 (T)	RA t40 (T)
YLR216C	CPR6	1	4.88447	6.05728	4.53149	2.33031	0.591495	1	2.207	7.11347	10.5834	14.3125	14.0953	1	1.97992	4.34351	4.80065	3.51503	1.44627
YDR151C	CTH1	1	3.18393	2.66731	1.76696	1.56097	0.736625	1	1.4589	3.6601	3.59734	3.08701	2.38507	1	1.18859	1.66176	1.77203	1.7294	1.43358
YHR176W	FMO	1	2.99296	2.72914	1.42559	1.43016	1.70164	1	1.81758	2.06635	2.68163	3.31438	4.18225	1	1.60411	2.51398	2.17992	1.53772	1.6151
YDR171W	HSP42	1	17.957	13.9022	8.50512	6.60119	0.844639	1	18.1322	77.0784	93.9025	69.6317	43.1372	1	8.53136	14.5454	11.2755	7.26092	2.08762
YLR259C	HSP60	1	2.85447	2.92237	2.03479	1.2615	0.424412	1	1.43756	3.00439	4.24767	4.92894	3.78795	1	1.56468	2.55364	2.46315	1.66429	0.738799
YFL016C	MDJ1	1	6.46356	6.79081	4.19515	2.93923	0.732619	1	5.68164	9.40751	13.2846	13.9828	8.37088	1	2.65337	5.62086	5.41509	3.67443	1.54574
YMR200W	ROT1	1	2.19241	2.46047	1.53669	1.15655	0.670981	1	0.969686	2.14583	2.10448	2.18103	2.02061	1	1.02641	1.12493	1.17244	1.19059	1.14935
YNL007C	SIS1	1	6.60689	6.92641	3.96019	2.14486	0.374242	1	2.4468	16.6081	13.2285	14.5323	7.56747	1	1.45376	2.83143	3.32449	3.2073	2.28963
YAL005C	SSA1	1	6.84327	5.32275	3.49536	1.75204	0.530825	1	1.63848	3.09998	3.80182	3.09195	2.46617	1	1.37678	2.35963	2.6735	2.64526	2.06157
YLL024C	SSA2	1	5.06262	4.09949	2.73072	1.59412	0.394952	1	1.32322	2.03873	2.57411	2.39067	2.17671	1	1.19276	1.72469	1.91801	1.96609	1.674
YOR027W	STI1	1	5.5009	5.03466	3.11171	1.76803	0.469098	1	1.84318	6.08802	8.77591	11.0004	6.30278	1	1.52409	2.85687	3.17285	2.79639	1.75531
YDR214W	YDR214W	1	6.49333	5.21751	3.26503	2.51598	0.77653	1	2.18947	5.19479	5.95805	5.02642	4.90679	1	1.77406	3.46637	3.6961	3.23384	2.07615
Clusters 7-10
ORF name	Gene name	TR t0	TR t4	TR t11	TR t16	TR t26	TR t40	RA t0	RA t4	RA t11	RA t16	RA t26	RA t40	RA t0 (T)	RA t4 (T)	RA t11 (T)	RA t16 (T)	RA t26 (T)	RA t40 (T)
YIL142W	CCT2	1	0.915719	1.435	1.4063	1.449	1.02932	1	1.0043	1.10853	0.719996	0.799962	0.888553	1	0.997385	1.01657	1.04733	1.10314	1.12866
YJL014W	CCT3	1	1.09768	1.45646	1.16167	1.23042	1.03268	1	0.853983	1.0978	0.681199	0.529856	0.613369	1	1.0047	1.04908	1.07914	1.10521	1.11127
YDL143W	CCT4	1	0.993971	1.2486	1.08631	1.03432	0.876005	1	0.986352	0.990201	0.673168	0.405876	0.519694	1	0.999588	1.02777	1.05029	1.05284	1.01171
YJR064W	CCT5	1	2.57993	2.5787	1.66549	1.67003	1.11064	1	0.539143	0.714461	0.612929	0.73948	0.984178	1	1.11172	1.44761	1.55949	1.59312	1.50114
YDR188W	CCT6	1	1.23242	1.9339	1.42366	1.53738	1.01482	1	1.0447	0.927993	0.706649	0.594807	0.841765	1	1.03935	1.3241	1.45138	1.47485	1.28617
YJL111W	CCT7	1	1.07789	1.39584	1.20422	1.13927	1.09128	1	0.775201	0.881853	0.565822	0.516256	0.503939	1	1.00297	1.03332	1.05799	1.07799	1.08665
YJL008C	CCT8	1	1.07843	1.94041	1.84604	1.85344	1.22311	1	0.748269	0.568578	0.474258	0.581414	0.682844	1	1.00748	1.16588	1.32916	1.53728	1.51881
YNL135C	FPR1	1	2.06649	1.9552	1.24501	1.12223	0.704518	1	1.11777	1.41149	1.44547	1.08538	0.773522	1	1.05452	1.21599	1.26263	1.24363	1.13737
YML048W	GSF2	1	1.3318	2.02371	1.87581	2.36548	1.54039	1	1.02248	0.968688	0.923635	0.910369	1.17374	1	1.01145	1.08979	1.16241	1.31876	1.454
YMR186W	HSC82	1	4.555	6.99652	3.03926	2.20202	0.856272	1	1.07487	1.28555	1.83413	1.71707	1.6308	1	1.08837	1.48677	1.70173	1.80979	1.76106
YGR231C	PHB2	1	1.51562	1.50208	1.12353	1.13949	0.90734	1	0.836075	0.789586	0.634269	1.09868	1.77653	1	1.01738	1.07324	1.09281	1.09897	1.08177
YJL117W	PHO86	1	1.61218	2.28917	1.99303	2.00634	1.52046	1	0.961895	1.21206	1.02393	0.847706	1.27755	1	1.03873	1.22973	1.3679	1.54577	1.61946
YKL117W	SBA1	1	1.73419	2.6133	1.88311	1.7498	0.823658	1	0.538085	1.3663	1.21122	0.95532	0.998321	1	1.06094	1.36171	1.53403	1.63278	1.45201
YDL212W	SHR3	1	2.46967	3.50656	2.75091	1.82365	1.43023	1	1.08358	1.66219	1.31047	0.656464	0.572664	1	1.07676	1.40949	1.62603	1.77788	1.72636
YDR212W	TCP1	1	2.98477	3.33274	2.35306	1.71031	1.31778	1	1.04747	1.24209	0.952791	0.657776	0.636825	1	1.14519	1.62245	1.83329	1.89009	1.72617
YLR090W	XDJ1	1	2.40423	2.20063	1.31196	1.20035	0.911107	1	0.779629	0.82612	0.913596	0.853016	1.09913	1	1.35889	1.97296	1.82496	1.36515	1.0475
YHR034C	YHR034C	1	1.86443	1.96713	1.43723	1.42337	0.611768	1	0.96207	1.13353	1.20563	1.04446	1.13228	1	1.03674	1.16175	1.21725	1.25906	1.18989
YNL310C	YNL310C	1	2.43493	2.53327	1.44884	0.996326	0.707669	1	1.18082	1.63167	1.4348	1.0042	1.23658	1	1.09551	1.3965	1.48905	1.40679	1.1881

## Sheet: Ribosomal Protein
Table S3. Parameters [TR, RA and theoretical (T) RA] for ribosomal protein genes. All data are relative to the corresponding value at time 0.
ORF name	Gene name	TR t0	TR t4	TR t11	TR t16	TR t26	TR t40	RA t0	RA t4	RA t11	RA t16	RA t26	RA t40	RA t0 (T)	RA t4 (T)	RA t11 (T)	RA t16 (T)	RA t26 (T)	RA t40 (T)
YBL027W	RPL19B	1	0.281242	0.127763	0.134501	0.112477	0.161695	1	1.00919	1.1177	0.674647	0.302596	0.0871372	1	0.967228	0.851136	0.771267	0.635422	0.495998
YBL038W	MRPL16	1	1.08587	1.41362	1.28115	1.0671	0.809226	1	0.930486	1.66237	1.77705	1.63707	1.52846	1	1.02014	1.18017	1.26056	1.17714	0.93762
YBL072C	RPS8A	1	0.769112	1.60859	1.4756	0.659153	0.210082	1	1.02454	1.13365	0.854834	0.134083	0.25745	1	0.993458	1.01292	1.04973	1.05078	0.936614
YBL087C	RPL23A	1	0.226021	0.139773	0.0950119	0.0995025	0.198447	1	0.889557	0.921777	0.665945	0.26613	0.279618	1	0.928816	0.711363	0.582002	0.394174	0.275173
YBL092W	RPL32	1	0.375201	0.288222	0.213409	0.20747	0.137893	1	0.87561	0.878056	0.774897	0.291703	0.333731	1	0.979627	0.90818	0.855573	0.756512	0.634719
YBR031W	RPL4A	1	0.171679	0.237359	0.277831	0.462242	0.635345	1	0.932045	0.7214	0.285675	0.0754788	0.111613	1	0.986047	0.940826	0.912343	0.868166	0.832455
YBR048W	RPS11B	1	0.304389	0.129802	0.128582	0.100648	0.157291	1	0.960947	1.08493	0.73778	0.129357	0.173147	1	0.985853	0.93226	0.891915	0.815753	0.723546
YBR084C-A	RPL19A	1	0.309196	0.186227	0.135277	0.157312	0.224144	1	1.00209	1.16922	0.781262	0.19121	0.10431	1	0.975829	0.889859	0.827355	0.715699	0.599552
YBR122C	MRPL36	1	1.93624	1.7594	1.1445	1.16692	1.03277	1	1.00973	1.68962	1.26269	1.20829	1.16992	1	1.07672	1.27749	1.30934	1.25556	1.18161
YBR146W	MRPS9	1	1.64696	2.78479	2.56535	2.67839	1.73985	1	0.929215	1.11544	1.18501	1.16715	0.948855	1	1.01105	1.08207	1.14936	1.27127	1.37701
YBR181C	RPS6B	1	0.273212	0.16845	0.107034	0.136189	0.278748	1	0.778806	0.898441	0.539152	0.0685258	0.112543	1	0.982487	0.919857	0.873388	0.786776	0.695828
YBR189W	RPS9B	1	0.0267793		0.0143292	0.0567036	0.0898322	1	1.0058	0.843259	0.167274		0.103129	1	0.976689	0.898001	0.845409	0.752648	0.646283
YBR191W	RPL21A	1	0.324772	0.1988	0.136538	0.106352	0.101937	1	1.18277	1.26905	0.802836	0.0468178	0.226575	1	0.991228	0.958506	0.933012	0.88153	0.81339
YBR251W	MRPS5	1	1.43	0.996688	0.526127	0.482042	0.520271	1	0.836386	1.11116	0.943633	0.566544	0.664009	1	1.04627	1.09718	1.00972	0.786109	0.628999
YBR268W	MRPL37	1	0.625128	0.384742	0.475507	0.2486	0.312434	1	0.452213	0.46831	0.364156	0.27599	0.494892	1	0.920941	0.67028	0.561775	0.403983	0.30964
YBR282W	MRPL27	1	1.4674	1.50539	0.885844	1.07166	1.03917	1	1.20695	1.33959	1.46434	1.23084	1.76445	1	1.08435	1.29212	1.2426	1.08299	1.05905
YCR003W	MRPL32	1	1.89804	1.87317	1.23321	1.1353	0.641023	1	0.76898	1.09191	1.01557	0.947432	1.02751	1	1.11198	1.40507	1.4426	1.31223	1.02772
YCR031C	RPS14A	1	0.410771	0.338187	0.21756	0.181398	0.272192	1	0.810352	1.07702	0.873475	0.309173	0.142396	1	0.992607	0.965821	0.944391	0.898715	0.841822
YDL061C	RPS29B	1	0.150051	0.1459	0.101794	0.119429	0.117935	1	1.09066	1.2029	0.815405	0.211337	0.126016	1	0.988766	0.950425	0.92332	0.870906	0.803866
YDL075W	RPL31A	1	0.267809	0.0839604	0.0785671	0.0609863	0.039889	1	1.44756	1.60155	1.48557	0.173824	0.211704	1	0.907381	0.623642	0.464926	0.267042	0.131587
YDL082W	RPL13A	1	0.433022	0.168516	0.277382	0.127331	0.11584	1	1.06829	1.48501	0.817742	0.300884	0.0708688	1	0.988629	0.941279	0.905707	0.837605	0.742613
YDL083C	RPS16B	1	0.265115	0.381627	0.420202	0.529346	0.162885	1	0.910915	1.56156	1.07904		0.136515	1	0.963239	0.857497	0.802124	0.728011	0.608573
YDL136W	RPL35B	1	0.688522	0.4496	0.472414	0.265029	0.22995	1	1.85272	3.14418	2.50608	0.722126	0.15006	1	0.995936	0.976676	0.959986	0.922255	0.862839
YDL191W	RPL35A	1	0.443988	0.261729	0.188436	0.206982	0.239996	1	0.977208	1.28985	0.956901	0.132764	0.138317	1	0.986188	0.932484	0.889167	0.807146	0.712629
YDL202W	MRPL11	1	1.22004	1.16423	0.685172	0.433573	0.277464	1	0.97091	0.588526	0.426534	0.454455	1.07683	1	1.04393	1.12418	1.02638	0.689736	0.405331
YDR012W	RPL4B	1	0.409967	0.430797	0.376135	0.403499	0.528472	1	1.01974	0.801606	0.361656	0.116475	0.166913	1	0.96791	0.869807	0.808341	0.705574	0.628705
YDR025W	RPS11A	1	0.254019	0.181979	0.168987	0.205582	0.219416	1	1.03933	1.25168	0.824197	0.339944	0.148722	1	0.982862	0.922842	0.88049	0.804196	0.715061
YDR064W	RPS13	1	0.333946	0.348481	0.262209	0.24352	0.274179	1	0.696499	1.05049	0.89638	0.378826	0.351243	1	0.877022	0.597194	0.475759	0.329198	0.277669
YDR116C	MRPL1	1	2.51479	3.03495	2.0524	1.4552	0.502944	1	1.65329	2.95076	3.08486	2.3379	1.56773	1	1.14722	1.64882	1.8489	1.79987	1.34565
YDR237W	MRPL7	1	1.93356	2.21719	1.61559	1.3846	1.18412	1	0.774967	0.805414	0.853882	0.948679	1.21253	1	1.05473	1.25203	1.34497	1.38423	1.34703
YDR322W	MRPL35	1	1.82253	1.69498	1.1321	1.13942	0.984054	1	1.07659	1.22127	1.05728	0.710497	0.759779	1	1.06358	1.23545	1.26654	1.22283	1.14956
YDR337W	MRPS28	1	1.56401	1.97096	1.48747	1.27305	0.763606	1	0.889573	1.59139	1.95615	1.8578	1.40872	1	1.12974	1.54269	1.62159	1.42392	1.01245
YDR418W	RPL12B	1	0.72213	0.510043	0.503029	0.43184	0.322147	1	0.831443	0.821727	0.516749	0.166961	0.138885	1	0.995956	0.976864	0.959895	0.924973	0.871307
YDR447C	RPS17B	1	0.190908	0.0186478	0.0541555	0.0261275	0.0943283	1	1.0273	1.11786	0.756755		0.0607113	1	0.915965	0.651583	0.501847	0.303657	0.173961
YDR450W	RPS18A	1	0.222624	0.277785	0.2397	0.276576	0.183842	1	0.933476	1.88422	1.89247		0.225022	1	0.981449	0.921977	0.882951	0.811646	0.720664
YDR462W	MRPL28	1	1.93416	2.18156	1.36254	1.84788	1.24747	1	0.637422	0.664943	0.874977	1.06564	1.09951	1	1.05	1.22871	1.2979	1.37512	1.42444
YDR471W	RPL27B	1	0.0969076		0.0570776		0.0971308	1	1.28885	1.7324	1.15824		0.164301	1	0.959692	0.823956	0.737584	0.591638	0.442811
YDR500C	RPL37B	1	0.544668	0.457683	0.26939	0.24114	0.22614	1	0.986713	1.07465	0.675218		0.232794	1	0.962314	0.839873	0.745441	0.571106	0.415973
YEL054C	RPL12A	1	0.29064	0.0907435	0.126873	0.126295	0.185543	1	0.778583	0.778312	0.521683	0.148579	0.132448	1	0.988953	0.946127	0.91383	0.854262	0.781478
YER056C-A	RPL34A	1	0.496379	0.359686	0.268023	0.232149	0.118715	1	1.23912	1.27199	1.0759	0.406114	0.281351	1	0.985018	0.928758	0.883781	0.794485	0.675602
YER074W	RPS24A	1	0.485306	0.403495	0.346592	0.349553	0.264549	1	1.06902	0.91511	0.647405	0.117819	0.212912	1	0.98213	0.919125	0.872825	0.787384	0.681186
YER102W	RPS8B	1	1.24429	2.26375	1.20773	1.4198	0.347264	1	0.969033	0.986184	0.809716		0.160316	1	1.00543	1.06283	1.09949	1.12258	1.08556
YER117W	RPL23B	1	0.339913	0.187426	0.0735361	0.053034	0.0658737	1	1.00618	0.838618	0.515124	0.07729	0.172217	1	0.902417	0.619671	0.453433	0.23393	0.11545
YER131W	RPS26B	1	0.158848	0.0875777	0.168189	0.1745	0.309554	1	1.0329	0.995968	0.722219	0.221071	0.165385	1	0.99095	0.958645	0.936445	0.896093	0.848374
YFR031C-A	RPL2A	1	0.155107	0.0759898	0.0530586	0.11146	0.219912	1	0.907417	0.739187	0.452701	0.0548058	0.0871001	1	0.98521	0.932911	0.895294	0.826424	0.749509
YGL030W	RPL30	1	0.186655	0.118454	0.0677315	0.0670985	0.235238	1	0.278733	0.218319	0.115285	0.0457273	0.265158	1	0.968949	0.864233	0.792241	0.663287	0.541367
YGL031C	RPL24A	1	0.357813	0.63133	0.444202	0.243718	0.186844	1	1.12793	1.28117	0.927604	0.112077	0.245221	1	0.96769	0.889553	0.846363	0.730199	0.572381
YGL076C	RPL7A	1				0.0175052	0.133327	1	0.668934	0.858618	0.533009	0.151369	0.0287383	1	0.93045	0.720725	0.600535	0.419781	0.283999
YGL103W	RPL28	1	0.0848606	0.100225	0.0762677	0.0538639	0.165802	1	0.811661	0.964064	0.688897	0.101878	0.0886603	1	0.880341	0.56944	0.424115	0.239535	0.163158
YGL123W	RPS2	1	0.120816	0.0709754	0.0732965	0.195595	0.396978	1	0.940813	0.802341	0.456703	0.099441	0.121359	1	0.970263	0.870457	0.804291	0.698134	0.612551
YGL135W	RPL1B	1	0.209463	0.221146	0.261819	0.369802	0.624627	1	1.07754	1.57467	0.651042		0.0969665	1	0.959227	0.832373	0.758545	0.655312	0.608453
YGL147C	RPL9A	1	0.385691	0.5246	0.289131	0.25859	0.309092	1	1.24579	1.11973	0.684661	0.0360505	0.140995	1	0.955876	0.840323	0.765141	0.610389	0.477263
YGL189C	RPS26A	1	0.304852	0.335677	0.314412	0.366721	0.421114	1	1.3238	1.34934	1.18014	0.383762	0.266761	1	0.9802	0.91645	0.87503	0.802888	0.727832
YGR027C	RPS25A	1	0.901599	0.779667	0.476856	0.564542	0.544732	1	0.985996	0.85932	0.667764	0.256104	0.224468	1	0.996613	0.978373	0.948669	0.879757	0.808611
YGR034W	RPL26B	1	0.177239	0.122666	0.0958727	0.0677725	0.202324	1	0.863979	0.867495	0.437728	0.0438281	0.188008	1	0.944567	0.770389	0.66338	0.490203	0.353892
YGR076C	MRPL25	1	1.5118	1.53169	0.888117	1.02344	0.837261	1	0.86686	1.46557	1.43247	1.26373	1.17809	1	1.10279	1.3373	1.26727	1.06168	0.936482
YGR085C	RPL11B	1	0.114695	0.0836049	0.0812965	0.172445	0.214347	1	1.07505	1.14348	0.76224	0.174634	0.117676	1	0.979117	0.908297	0.860268	0.777547	0.687417
YGR118W	RPS23A	1	1.01625	1.09484	0.729417	0.916282	0.797962	1	0.884337	1.16476	0.840285	0.233936	0.310303	1	1.00255	1.02871	0.982574	0.897149	0.860481
YGR148C	RPL24B	1	0.897737	0.777945	0.685304	1.05406	0.681475	1	1.19759	1.24211	1.23417	0.433244	0.274432	1	0.997709	0.985418	0.971368	0.960815	0.946395
YGR165W	MRPS35	1	1.43619	1.16013	0.650871	0.766301	0.715118	1	0.739582	0.697386	0.537481	0.841084	1.15653	1	1.0365	1.10443	1.06299	0.937566	0.845298
YGR214W	RPS0A	1	0.324756	0.116263	0.114134	0.151875	0.202495	1	0.924526	0.88103	0.609543	0.0595054	0.0851835	1	0.994951	0.974838	0.95884	0.928393	0.889913
YGR220C	MRPL9	1	1.07826	0.895067	0.554587	0.81152	0.752469	1	1.14811	0.720496	0.889861	1.32525	1.53514	1	1.02835	0.97372	0.774114	0.734615	0.766643
YHL001W	RPL14B	1	0.235448	0.103864	0.0639497	0.067634	0.0568812	1	1.01494	0.66359	0.558204	0.1779	0.214768	1	0.841615	0.452621	0.284413	0.131282	0.0737725
YHL015W	RPS20	1	0.172328	0.114804	0.0775735	0.0488268	0.105238	1	1.21696	1.05473	0.90172	0.293659	0.305348	1	0.986653	0.939882	0.906184	0.840184	0.757943
YHL033C	RPL8A	1			0.2418	0.0741301	0.210448	1	1.08506	1.03109	0.834406	0.124573	0.435902	1	0.972048	0.879809	0.827741	0.738564	0.631179
YHR010W	RPL27A	1	0.135011	0.0621493	0.0428222	0.0535091	0.0672054	1	0.964226	0.774789	0.612248	0.10233	0.309194	1	0.931753	0.720505	0.594797	0.408635	0.254987
YHR021C	RPS27B	1	0.253191	0.373651	0.327923	0.17812	0.284668	1	0.918513	0.836177	0.850517	0.249318	0.423916	1	0.861793	0.578282	0.483819	0.324431	0.26231
YHR141C	RPL42B	1	0.846344	0.426982	0.212417	0.320265	0.415022	1	0.690089	0.880101	0.352758		0.271917	1	0.98601	0.882001	0.759946	0.571869	0.473811
YHR147C	MRPL6	1	1.26038	1.0007	0.685983	0.898509	0.797358	1	0.661274	0.282044			1.6837	1	1.07225	1.09523	0.936847	0.841966	0.830461
YIL018W	RPL2B	1	0.187501	0.160064	0.121765	0.145766	0.187974	1	0.879134	0.924785	0.553243	0.0604157	0.0973686	1	0.980414	0.914108	0.868157	0.78351	0.686418
YIL052C	RPL34B	1	0.371132	0.362119	0.259758	0.213797	0.158697	1	1.01261	1.38711	1.24121	0.282034	0.278695	1	0.974547	0.892153	0.83465	0.722213	0.58646
YIL069C	RPS24B	1	0.36597	0.265436	0.251664	0.225174	0.326494	1	1.0461	0.987178	0.674199	0.0892903	0.124436	1	0.976379	0.893534	0.835672	0.731729	0.625263
YIL133C	RPL16A	1	0.283908	0.151907	0.104001	0.0557828	0.0275024	1	0.845425	1.16247	0.761991	0.0981662	0.192089	1	0.976861	0.89387	0.833143	0.718378	0.578577
YIL148W	RPL40A	1	0.550756	0.611668	0.327717	0.313683	0.222657	1	1.33435	1.30569	1.05168	0.143602	0.177885	1	0.98621	0.944191	0.908292	0.823037	0.713405
YJL063C	MRPL8	1	1.53337	2.34837	1.3608	1.28017	0.789552	1	1.29045	0.542568	0.604866	1.07096	0.841545	1	1.07134	1.43545	1.55519	1.43036	1.14938
YJL096W	MRPL49	1	2.00943	1.97219	1.25277	1.18508	0.925282	1	1.36076	1.42912	1.3025	0.92637	1.17481	1	1.21064	1.65711	1.62014	1.33268	1.0766
YJL136C	RPS21B	1	0.337441	0.0863282	0.0724563	0.0692458	0.119333	1	1.28803	1.06268	0.891019	0.342624	0.171192	1	0.954176	0.786531	0.669201	0.487135	0.331543
YJL189W	RPL39	1	0.246667	0.0853915	0.0476774	0.0464186	0.0632924	1	0.955342	1.10187	0.950725	0.610052	0.700714	1	0.748275	0.275911	0.134235	0.0565899	0.0585231
YJL190C	RPS22A	1	0.0921247	0.0518622	0.0214715	0.0139158	0.0665732	1	1.02108	0.868651	0.452473	0.133446	0.118455	1	0.958471	0.823415	0.735825	0.584848	0.432041
YJR123W	RPS5	1	0.249531	0.0818292	0.069718	0.0541568	0.190947	1	1.05499	0.865173	0.564058	0.0652147	0.171035	1	0.970982	0.866268	0.791575	0.660175	0.530509
YJR145C	RPS4A	1	0.194163	0.103289	0.0869191	0.129043	0.254741	1	0.824355	0.809083	0.565189	0.0766717	0.156698	1	0.989535	0.951838	0.924233	0.872495	0.812944
YKL006W	RPL14A	1	0.199545	0.0797459	0.0483945	0.0413116	0.108992	1	1.20514	1.053	0.685506	0.220218	0.187545	1	0.700106	0.218533	0.104561	0.0481828	0.0908512
YKL138C	MRPL31	1	1.98751	2.16657	1.30339	0.830142	0.543634	1	0.880914	1.27193	1.29199	1.10112	1.01857	1	1.0603	1.26411	1.33173	1.25605	1.04752
YKL156W	RPS27A	1	0.60613	0.404171	0.281305	0.227777	0.219381	1	1.11924	0.810864	0.338391	0.169629	0.201841	1	0.985879	0.927619	0.876216	0.771768	0.64743
YKL170W	MRPL38	1	2.22253	2.67769	1.72879	1.5485	0.989525	1	0.938741	0.828243	1.06587	1.00643	0.908183	1	1.11499	1.51475	1.66326	1.65057	1.44146
YKL180W	RPL17A	1	0.406402	0.321309	0.243541	0.247068	0.199446	1	0.950975	1.13154	0.686078	0.0853036	0.246597	1	0.995661	0.979619	0.966929	0.940905	0.904925
YKR006C	MRPL13	1	1.4579	1.27536	0.585299	0.878134	0.726786	1	0.770905	0.783612	0.623935	0.534959	0.701218	1	1.02897	1.09797	1.07099	0.977792	0.910704
YKR057W	RPS21A	1	0.273192	0.170699	0.11519	0.142572	0.18718	1	1.00252	0.953196	0.733722	0.122931	0.174141	1	0.951369	0.792268	0.687794	0.522833	0.384763
YKR085C	MRPL20	1	1.32627	1.41652	0.876322	1.00244	0.911967	1	0.940514	0.895031	0.593376	0.403686	0.580178	1	1.03987	1.16477	1.15533	1.05366	0.990937
YKR094C	RPL40B	1	0.485016	0.343942	0.268763	0.298948	0.530396	1	1.10767	1.26791	0.940857	0.506737	0.139954	1	0.992313	0.962578	0.938293	0.890783	0.843297
YLL045C	RPL8B	1	0.0800631	0.0339854	0.0331347	0.0562126	0.0710937	1	0.993174	0.991233	0.688521	0.106603	0.267937	1	0.952593	0.799843	0.704106	0.549745	0.398323
YLR009W	RPL24	1	0.162122	0.281721	0.154976	0.118557	0.21197	1	0.833909	0.146763	0.0492129	0.0567929	0.105407	1	0.979367	0.915889	0.873526	0.786787	0.687087
YLR029C	RPL15A	1	0.225625	0.241957	0.281079	0.394419	0.44226	1	0.911895	1.23312	0.832071	0.279843	0.275337	1	0.974086	0.890513	0.838944	0.760351	0.687678
YLR048W	RPS0B	1	0.146614	0.0953406	0.0844365	0.0951503	0.110427	1	1.09706	1.04651	0.56433	0.0400917	0.212797	1	0.982005	0.919881	0.876664	0.796869	0.700386
YLR061W	RPL22A	1	0.0942725	0.130414	0.104001	0.178053	0.0774396	1	0.966994	0.863055	0.407632	0.0386402	0.201578	1	0.96055	0.837349	0.760909	0.636616	0.498747
YLR075W	RPL10	1	0.219004	0.129488	0.116117	0.138665	0.424344	1	1.24932	1.06407	0.885101	0.30533	0.271636	1	0.8754	0.546625	0.39344	0.237003	0.289602
YLR167W	RPS31	1	0.242925	0.360686	0.366195	0.303557	0.307727	1	1.10922	1.2479	0.937051	0.501038	0.139304	1	0.982081	0.927231	0.894334	0.830877	0.749507
YLR185W	RPL37A	1	0.235132	0.100632	0.0600909	0.0824672	0.0807681	1	1.01595	0.988976	0.730049	0.128991	0.150773	1	0.961436	0.828611	0.737031	0.584236	0.430405
YLR264W	RPS28B	1	0.620097	0.472995	0.378914	0.414935	0.341353	1	1.02052	1.21584	1.09216	0.470287	0.356403	1	0.980408	0.906026	0.845875	0.740821	0.626952
YLR333C	RPS31B	1	0.549962	0.358821	0.347416	0.410155	0.422526	1	0.907303	0.933905	0.833571	0.346739	0.230848	1	0.983654	0.918741	0.868465	0.785461	0.700842
YLR344W	RPL26A	1	0.505469	0.341483	0.269247	0.248474	0.155777	1	0.786932	0.922259	0.570911	0.201322	0.172593	1	0.989494	0.948296	0.914557	0.847557	0.757016
YLR367W	RPS22B	1	0.350795	0.16954	0.153463	0.151035	0.245463	1	0.943172	1.04419	0.665907	0.311293	0.262808	1	0.953538	0.792166	0.684037	0.517354	0.388441
YLR388W	RPS29A	1	3.83102	4.85222	2.60978	1.85254	1.02966	1	1.04397	1.83153	2.17456	1.80125	1.07721	1	1.0889	1.43533	1.61108	1.70146	1.64601
YLR406C	RPL31B	1	1.21123	1.32786	0.803497	0.916564	0.237111	1	1.85185	1.22424	0.862924	0.406531	1.17263	1	1.01262	1.06332	1.06268	1.00927	0.847885
YLR439W	MRPL4	1	0.921333	0.885765	0.472107	0.525569	0.426859	1	0.826222	1.0195	0.956358	1.10573	0.968132	1	0.995871	0.979764	0.940909	0.835903	0.720987
YLR441C	RPS1A	1	0.288037	0.219616	0.173198	0.251339	0.621059	1	0.972337	1.2821	0.980323	0.0970333	0.163082	1	0.992	0.963312	0.941906	0.90177	0.866483
YLR448W	RPL6B	1	0.182758	0.135175	0.0858585	0.0967708	0.178836	1	0.851704	0.98325	0.69361		0.109399	1	0.982434	0.921898	0.878834	0.79749	0.704244
YML024W	RPS17A	1	0.731806	0.703621	0.52091	0.405253	0.386997	1	0.901206	0.886453	0.627244	0.255708	0.272381	1	0.98564	0.938221	0.895686	0.790131	0.663014
YML026C	RPS18B	1	0.527293	0.234378	0.162799	0.144852	0.146088	1	0.890983	0.823607	0.572075	0.207116	0.193483	1	0.98499	0.919839	0.863609	0.757284	0.632988
YML063W	RPS1B	1	0.335089	0.176	0.127477	0.180836	0.220892	1	0.858699	1.11188	0.748103	0.0921853	0.151777	1	0.992256	0.962583	0.939132	0.894404	0.839721
YML073C	RPL6A	1	0.292998	0.147323	0.103454	0.0905808	0.0759426	1	1.05494	0.890388	0.549903	0.0641934	0.175777	1	0.990342	0.954034	0.925956	0.870736	0.798283
YMR024W	MRPL3	1	1.31398	1.4426	1.02466	1.15749	1.02579	1	0.843185	0.652652	0.631023	0.832043	1.07599	1	1.0125	1.0615	1.07789	1.08075	1.08268
YMR121C	RPL15B	1	0.488212	0.551208	0.455187	0.77861	0.789424	1	0.850783	0.985667	0.82192	0.629031	0.595257	1	0.979739	0.918805	0.878548	0.831412	0.819733
YMR142C	RPL13B	1	0.325756	0.112745	0.0768377	0.0746974	0.070384	1	0.826146	0.922678	0.522308	0.0755679	0.21397	1	0.963142	0.828492	0.731383	0.569394	0.406452
YMR188C	MRPS17	1	2.48364	2.43418	1.69802	1.59191	1.14171	1	0.849279	1.29146	1.30551	1.30014	1.2471	1	1.05866	1.24415	1.32291	1.38178	1.37544
YMR193W	MRPL24	1	1.70981	1.32955	0.865811	0.756297	0.610122	1	0.989742	1.38943	1.14822	0.931851	0.862254	1	1.06143	1.1847	1.16501	1.03304	0.863342
YMR194W	RPL36A	1	0.443932	0.182361	0.110637	0.118092	0.136142	1	0.984744	1.14829	0.716568	0.165054	0.0893724	1	0.9866	0.93112	0.884495	0.795736	0.69043
YMR225C	MRPL44	1	1.5661	1.77288	1.15728	1.13695	0.921084	1	0.943037	1.29622	1.26927	1.58098	1.85377	1	1.06443	1.27921	1.32434	1.24228	1.11006
YMR230W	RPS10B	1	0.802103	0.83389	0.274	0.23699	0.377153	1	0.965604	2.04198	1.1253	0.763985	0.30904	1	0.99418	0.976647	0.945852	0.84963	0.747328
YMR242C	RPL20A	1	0.569222	0.497159	0.358103	0.324286	0.359406	1	1.06642	1.01628	0.748116	0.113597	0.15969	1	0.99691	0.985356	0.975393	0.952943	0.922886
YMR286W	MRPL33	1	4.36041	3.20062	1.76794	1.63407	1.15516	1	1.21076	2.4813	2.54654	2.50411	2.26172	1	1.3101	2.0204	2.11519	1.95207	1.6609
YNL067W	RPL9B	1	0.501809	0.39849	0.352537	0.344752	0.403049	1	1.05526	1.10205	0.70413	0.0904843	0.146102	1	0.916228	0.686973	0.568459	0.43323	0.3942
YNL069C	RPL16B	1	0.145563	0.0727916	0.0556038	0.0551739	0.133266	1	0.883965	0.928871	0.61583	0.0832333	0.219356	1	0.985804	0.935723	0.899873	0.831832	0.750078
YNL096C	RPS7B	1	0.413411	0.189239	0.148798	0.171285	0.191903	1	0.929401	1.18573	0.746744	0.117174	0.186661	1	0.981612	0.909269	0.852302	0.749934	0.635892
YNL162W	RPL42A	1	0.328768	0.150546	0.123628	0.130087	0.230308	1	0.949629	1.33369	0.673359	0.434336	0.242436	1	0.864574	0.507945	0.342861	0.19416	0.193489
YNL177C	MRPL22	1	2.96216	3.46675	1.99656	1.78101	0.999532	1	0.890177	1.99484	1.81413	1.60065	1.41031	1	1.14654	1.64692	1.83624	1.85103	1.64087
YNL178W	RPS3	1	0.388985	0.282558	0.113326	0.099198	0.19057	1	1.04591	1.07826	0.723995	0.056732	0.0806261	1	0.978927	0.904041	0.844285	0.724824	0.598249
YNL185C	MRPL19	1	1.57574	2.22124	1.29691	1.21511	0.925765	1	0.941356	0.677715	0.994621	2.42583	1.94299	1	1.21964	1.86983	1.71673	1.2742	1.00384
YNL252C	MRPL17	1	3.12531	2.70013	1.68669	1.32917	0.842116	1	0.866218	1.57784	1.62161	1.57419	1.67386	1	1.2274	1.7826	1.87945	1.70909	1.34566
YNL284C	MRPL10	1	1.26593	0.96825	0.55389	0.809569	0.622232	1	0.699774	0.604764	0.529828	0.692514	0.764982	1	1.01988	1.04164	0.990309	0.89263	0.814136
YNL301C	RP18B	1	0.45151	0.331254	0.288013	0.302712	0.385221	1	0.919705	1.1345	0.687978	0.0931023	0.189978	1	0.940086	0.753051	0.639506	0.486457	0.409508
YNL302C	RPS19B	1	0.448348	0.41139	0.391836	0.428625	0.44731	1	0.906727	1.06362	0.651351	0.254814	0.20383	1	0.960729	0.838294	0.76378	0.653844	0.566196
YNL306W	MRPS18	1	3.10283	3.33251	2.30457	1.83984	1.20912	1	0.796391	1.18043	1.07012	0.955005	1.13693	1	1.13097	1.55652	1.74375	1.83142	1.71048
YNR022C	MRPL50	1	1.8429	2.66272	1.86157	2.12914	1.72307	1	0.912539	1.06886	1.21249	1.27968	1.5978	1	1.04055	1.23605	1.355	1.49716	1.61977
YOL040C	RPS15	1	0.301356	0.269545	0.140222	0.232646	0.277317	1	0.807575	0.959552	0.566204	0.156506	0.114717	1	0.998946	0.995186	0.992208	0.986149	0.978463
YOL120C	RPL18A	1	0.413183	0.325194	0.317782	0.393213	0.504746	1	1.03649	1.0659	0.811503	0.273674	0.271534	1	0.937609	0.748829	0.642331	0.518788	0.484348
YOL127W	RPL25	1	0.440156	0.266115	0.178475	0.159472	0.149565	1	0.751233	1.24201	1.58095	0.132918	0.337076	1	0.978108	0.895893	0.831481	0.710903	0.574503
YOR063W	RPL3	1	0.163812	0.124566	0.112008	0.202406	0.312247	1	0.803501	0.640036	0.365986	0.0604158	0.117308	1	0.968501	0.864156	0.795455	0.683562	0.58312
YOR096W	RPS7A	1	0.144257	0.0867842	0.0487844	0.0905182	0.139787	1	0.892884	1.23431	0.638757	0.0797548	0.158497	1	0.890661	0.589543	0.435166	0.252406	0.169151
YOR150W	MRPL23	1	3.45764	3.3177	2.18218	2.27674	1.85029	1	0.73874	1.26722	0.999541	1.53059	1.54644	1	1.12186	1.49386	1.64357	1.77657	1.85929
YOR167C	RPS28A	1	0.191414		0.122187	0.294431	0.466576	1	1.04108	1.05007	0.763135	0.220512	0.141129	1	0.947167	0.765194	0.65487	0.527018	0.473904
YOR182C	RPS30B	1	0.304219	0.269996	0.226778	0.255841	0.439534	1	1.10846	0.85785	1.29637	0.271034	0.510347	1	0.896743	0.628353	0.499303	0.355378	0.361976
YOR234C	RPL33B	1	0.444197	0.393675	0.285453	0.287558	0.222968	1	0.854625	0.736508	0.562585	0.316944	0.298014	1	0.971888	0.879167	0.812815	0.691597	0.5571
YOR293W	RPS10A	1	0.298597	0.0687793	0.0320809	0.0537215	0.11399	1	0.804188	0.567209	0.368676	0.0921103	0.322911	1	0.973474	0.872847	0.796786	0.663897	0.526254
YOR312C	RPL20B	1	0.2367	0.106162	0.0638382	0.0737474	0.106649	1	0.839574	0.777347	0.538021	0.153167	0.241386	1	0.994409	0.973471	0.957271	0.925168	0.883244
YOR369C	RPS12	1	0.238323	0.134664	0.0536133	0.240454	0.393517	1	0.722153	0.713879	0.593952	0.235851	0.11643	1	0.928533	0.70814	0.57171	0.407417	0.366303
YPL013C	MRPS16	1	2.49452	1.69494	1.042	1.41098	1.38427	1	1.09572	0.984715	0.492091	1.60353	1.04193	1	1.24038	1.62133	1.52047	1.36186	1.38556
YPL079W	RPL21B	1	0.214577	0.121723	0.0869481	0.0831682	0.092121	1	1.21274	1.12456	0.750295	0.0488283	0.237897	1	0.967919	0.858438	0.783248	0.650996	0.507562
YPL081W	RPS9A	1	0.262006	0.19131	0.166809	0.168898	0.16368	1	0.909886	0.777292	0.414228	0.109135	0.195712	1	0.911538	0.659404	0.525484	0.354121	0.241386
YPL090C	RPS6A	1	0.243941	0.161187	0.122526	0.240806	0.320931	1	0.798296	0.848574	0.517545	0.0360243	0.190896	1	0.97025	0.868859	0.798961	0.686379	0.586921
YPL131W	RPL5	1	0.171163	0.13572	0.106319	0.128988	0.225556	1	1.11581	1.03894	0.734329	0.183718	0.115807	1	0.985392	0.935036	0.899533	0.832842	0.756018
YPL143W	RPL33A	1	0.404089	0.310014	0.123672	0.113673	0.184335	1	0.928922	0.642307	0.402486	0.0739783	0.248098	1	0.976258	0.893453	0.827479	0.696252	0.560323
YPL173W	MRPL40	1	1.34154	0.885225	0.591867	1.02617	0.862891	1	0.805714	0.817635	1.18059	1.16323	1.25638	1	1.05057	1.06854	0.953735	0.889059	0.916514
YPL198W	RPL7B	1	0.109404	0.0984255	0.092271	0.111119	0.124468	1	1.08466	1.36986	0.915058	0.347712	0.235422	1	0.917242	0.678637	0.550533	0.375368	0.246832
YPL220W	RPL1A	1			0.152357	0.895713	0.966649	1	1.32975	1.1714	0.965173	0.220966		1	0.957914	0.823179	0.746664	0.705926	0.765304
YPR043W	RPL43A	1	0.229525	0.0315581	0.0251055	0.0357433	0.118659	1	1.022	0.766705	0.596015	0.0965578	0.340069	1	0.953958	0.792019	0.681921	0.507706	0.356676
YPR102C	RPL11A	1	0.166016	0.10799	0.143517	0.26917	0.315266	1	0.917582	0.910247	0.636876	0.081572	0.229764	1	0.990698	0.957767	0.934721	0.894957	0.849385
YPR132W	RPS23B	1	0.704813	0.779779	0.395047	0.583027	0.683873	1	0.96034	1.44536	0.765622	0.594085	0.270393	1	0.956643	0.864875	0.767501	0.619173	0.635303

## Sheet: rRNA Processing
Table S3. Parameters [TR, RA and theoretical (T) RA] for rRNA Procesing genes. All data are relative to the corresponding value at time 0.
ORF name	Gene name	TR t0	TR t4	TR t11	TR t16	TR t26	TR t40	RA t0	RA t4	RA t11	RA t16	RA t26	RA t40	RA t0 (T)	RA t4 (T)	RA t11 (T)	RA t16 (T)	RA t26 (T)	RA t40 (T)
YAL033W	POP5	1	1.0809	1.24719	0.762701	0.972838	0.807399	1	1.10134	1.15559	0.769687	0.470149	0.62665	1	1.00448	1.03407	1.02939	0.990273	0.955262
YBL004W	YBL004W	1	0.579023	0.524325	0.450517	0.298214	0.257292	1	1.01512	1.0137	0.693985	0.352657	0.305505	1	0.947627	0.796906	0.70714	0.53879	0.376591
YBL018C	POP8	1	1.4011	1.79344	1.36697	1.21161	1.07241	1	1.29028					1	1.29097	1.72994	1.46153	1.2292	1.08366
YBR142W	MAK5	1	0.200405	0.333319	0.218277	0.204469	0.247068	1	0.746346	0.7942	0.326355	0.0516614	0.164211	1	0.976165	0.904654	0.858555	0.767225	0.663533
YBR167C	POP7	1	2.19906	2.6776	1.90328	2.31736	2.6797	1	0.930734	0.906077	0.781623	0.766928	1.27242	1	1.14314	1.62304	1.80236	1.96014	2.29791
YBR247C	ENP1	1	0.173541	0.181129	0.116757	0.128955	0.222728	1	0.679644	0.331373	0.116027	0.115056	0.13869	1	0.934192	0.741142	0.628569	0.455021	0.332776
YBR257W	POP4	1	0.928695	1.8976	1.24692	1.18116	1.20461	1	0.796123	0.795552	0.467571	0.532275	0.701202	1	0.997388	1.0499	1.09626	1.11624	1.13408
YCL031C	RRP7	1	1.17245	1.17215	0.804706	0.725457	0.648095	1	1.08973	1.24817	0.925978	0.6574	0.77152	1	1.00544	1.02323	1.02034	0.982215	0.922284
YCL059C	KRR1	1	0.784885	0.836603	0.595625	0.589533	0.901601	1	1.0746	1.59975	1.09189	0.326049	0.0846594	1	0.994891	0.980004	0.964482	0.9222	0.895427
YCR035C	RRP43	1	1.5743	2.25481	2.1418	2.69943	2.47351	1	0.979814	1.71044	1.14996	0.922798	1.77701	1	1.06511	1.37047	1.58863	1.98349	2.32208
YCR057C	PWP2	1	0.727261	0.391476	0.338394		0.108863	1	0.632102	0.819205	0.34351		0.0459683	1	0.985846	0.911777	0.842915	0.682295	0.486413
YDL014W	NOP1	1	0.264903	0.223821	0.100108	0.169357	0.691959	1	1.01492	0.625311	0.235373	0.155217	0.117033	1	0.992856	0.967662	0.948193	0.90938	0.877897
YDL031W	DBP10	1	0.348445	0.328085	0.294623	0.316216	0.275697	1	0.769148	0.663298	0.237613	0.110256	0.195448	1	0.965661	0.856396	0.786755	0.671804	0.551938
YDL060W	TSR1	1	0.147199	0.192209	0.125315	0.114172	0.178981	1	0.901603	0.642781	0.294879	0.113503	0.152771	1	0.941854	0.771176	0.670809	0.50513	0.365047
YDL111C	RPR42	1	1.1812	1.95665	1.52446	1.10394	0.901397	1	1.3625	1.41557	1.27394	0.898446	0.824121	1	1.00712	1.08238	1.14523	1.17483	1.13126
YDL148C	NOP14	1	0.18012	0.30406	0.221542	0.175661	0.272051	1	0.878834	0.754134	0.356945	0.0647551	0.168219	1	0.97431	0.896837	0.848039	0.751909	0.646281
YDL208W	NHP2	1	0.451101	0.275233	0.203346	0.247623	0.335937	1	0.755962	0.342815	0.170261	0.0605843	0.0929265	1	0.954857	0.798232	0.688623	0.525695	0.420964
YDL213C	NOP6	1	1.27326	0.804088	0.587281	0.772194	0.579711	1	4.18499	3.4771	1.85393	0.229708	0.283767	1	1.00839	1.01109	0.987215	0.942976	0.889692
YDR021W	FAL1	1	1.0583	1.56304	1.1477	1.05694	0.694119	1	0.830109	1.22485	1.30144	0.909265	0.789115	1	1.00548	1.10032	1.15503	1.13273	0.992204
YDR083W	RRP8	1	0.826646	1.073	0.757759	0.755754	0.590548	1	0.964749	0.745557	0.457608	0.245949	0.261779	1	0.99183	0.985797	0.977363	0.929701	0.854275
YDR087C	RRP1	1	0.185692	0.284274	0.457814	1.5055	1.73306	1	0.885498	1.19175	1.14576	0.217608	0.376128	1	0.901629	0.656918	0.578086	0.800197	1.3037
YDR280W	RRP45	1	1.01324	1.05509	0.714453	0.762455	0.649602	1	0.561942	0.752976	0.491871	0.584137	0.819446	1	1.00039	1.00378	0.995054	0.959498	0.911248
YDR339C	YDR339C	1	0.833987	0.934922	0.615207	0.599962	0.620304	1	0.878061	0.524519	0.386015	0.338264	0.422311	1	0.96607	0.923845	0.850043	0.680294	0.625579
YDR412W	YDR412W	1				0.398417	0.673378	1	0.69935	0.556418	0.308104	0.159528	0.245347	1	0.981169	0.917816	0.875083	0.813901	0.779541
YDR478W	SNM1	1	2.0967	7.09955	5.09672	4.29773	0.584703	1	1.1678	4.31774	5.40015	3.37308	0.404948	1	1.18808	3.01032	4.16787	4.45735	2.65433
YER006W	NUG1	1	0.226451	0.35121	0.253641	0.226053	0.299191	1	0.904403	0.772983	0.351406	0.108694	0.139936	1	0.971342	0.886534	0.833538	0.730749	0.621811
YER082C	UTP7	1	0.424122	0.533555	0.263321	0.329895	0.282952	1	0.903839	0.990801	0.414351	0.113564	0.196409	1	0.935977	0.780237	0.679339	0.507876	0.391379
YER127W	LCP5	1	0.156167	0.332331	0.277433	0.488336	0.757573	1	0.736387	0.556225	0.210483	0.125769	0.265682	1	0.98527	0.940903	0.913421	0.868708	0.84045
YER133W	GLC7	1	2.29876	2.70007	2.01476	1.92265	1.43655	1	0.846963	1.56234	1.41606	1.42901	1.54367	1	1.07253	1.33604	1.47285	1.59716	1.61921
YFL002C	SPB4	1	1.52359	2.22542	1.80977	2.03297	0.906518	1	0.796468	0.986128	0.613915	0.752264	0.423658	1	1.03555	1.22369	1.35205	1.52445	1.48472
YGL029W	CGR1	1	0.328419	0.04421		0.0130438	0.0839081	1	0.625066	0.510184	0.252046	0.0362869	0.126047	1	0.78121	0.294971	0.114138	0.0213305	0.0616849
YGL030W	RPL30	1	0.186655	0.118454	0.0677315	0.0670985	0.235238	1	0.278733	0.218319	0.115285	0.0457273	0.265158	1	0.968949	0.864233	0.792241	0.663287	0.541367
YGL078C	DBP3	1	0.170626	0.165617	0.127301	0.125713	0.13531	1	0.807406	0.466635	0.0908516	0.0415605	0.18508	1	0.976589	0.899139	0.846886	0.750362	0.637324
YGL171W	ROK1	1	0.191146	0.276178	0.230456	0.24335	0.30609	1	0.649278	0.609472	0.170332	0.113276	0.115206	1	0.901627	0.654822	0.541177	0.394035	0.324773
YGL173C	KEM1	1	1.65551	2.21597	1.91511	1.92504	1.4332	1	0.710991	0.754091	0.763787	0.853916	1.09977	1	1.01597	1.09265	1.15095	1.24052	1.30918
YGR081C	YGR081C	1	0.434928	0.360752	0.179538	0.223255	0.320869	1	0.771633	0.497424	0.295111	0.206501	0.258526	1	0.973869	0.885095	0.815726	0.68549	0.568842
YGR090W	UTP22	1	0.414443	0.296403	0.237075	0.234623	0.286807	1	0.831569	0.642811	0.316761	0.243105	0.354854	1	0.99053	0.955175	0.927595	0.873294	0.807103
YGR095C	RPR46	1	1.14113	1.15899	0.783668	0.813507	0.545752	1	0.678169	0.824153	0.444717	0.416818	0.434713	1	1.00679	1.02973	1.02244	0.973286	0.884657
YGR158C	MTR3	1	0.432361	0.516928	0.465969	0.612404	0.735234	1	0.650302	0.685326	0.297461	0.117046		1	0.956609	0.838625	0.775108	0.69848	0.690323
YGR195W	SKI6	1	0.710979	0.552616	0.366758	0.359198	0.349323	1	1.02423	1.05591	0.584702	0.433371	0.562265	1	0.957178	0.811187	0.690294	0.506214	0.401537
YGR251W	YGR251W	1	0.756708	0.895113	0.662978	0.573393	0.258339	1	0.923375	0.891743	0.542723	0.511306	0.469123	1	0.938354	0.872224	0.814274	0.651539	0.396611
YGR272C	YGR272C	1	0.85036	0.699446	0.73143	0.600932	0.774941	1	1.01865	0.280627	0.225659	0.0713302	0.293785	1	0.984043	0.91309	0.863909	0.774746	0.73314
YGR280C	PXR1	1	1.22117	0.999361	0.590242	0.271035	0.294976	1	0.827963	0.948601	0.605902	0.37058	0.427238	1	1.00374	1.00986	1.0008	0.953922	0.878307
YHL034C	SBP1	1	1.34169	1.58298	0.892206	1.21985	0.858828	1	0.88253	0.75794	1.10407	0.339059	0.82141	1	1.00557	1.03123	1.03947	1.04095	1.0404
YHR034C	YHR034C	1	1.86443	1.96713	1.43723	1.42337	0.611768	1	0.96207	1.13353	1.20563	1.04446	1.13228	1	1.03674	1.16175	1.21725	1.25906	1.18989
YHR062C	RPP1	1	0.180297	0.239209	0.173915	0.27559	0.314696	1	1.0946	0.672254	0.419635	0.239412	0.484947	1	0.856504	0.533707	0.404407	0.296393	0.298761
YHR065C	RRP3	1	0.116288	0.154217	0.109847	0.151327	0.275708	1	0.846785	0.789592	0.262388	0.0887998	0.19963	1	0.849339	0.499535	0.358117	0.219254	0.225085
YHR069C	RRP4	1	0.865111	1.3748	1.19588	1.47416	1.19434	1	0.883565	0.643772	0.597096	0.35012	0.978492	1	0.99454	1.01237	1.03919	1.09566	1.15423
YHR085W	IPI1	1	0.697288	0.722409	0.578228	0.655013	0.576249	1	1.08226	1.18762	1.04288	0.812168	0.825434	1	0.962048	0.866316	0.802448	0.712412	0.648874
YHR148W	IMP3	1		0.207032	0.0581264	0.189937	0.423582	1	0.507628	0.332175	0.202441	0.226255	0.206748	1	0.958937	0.84176	0.770579	0.64796	0.562115
YHR169W	DBP8	1	0.405169	0.342694	0.22577	0.264135	0.263093	1	0.787697	0.275493	0.282033	0.1969	0.241361	1	0.930261	0.729278	0.607035	0.437395	0.334801
YJL033W	HCA4	1	0.624838	0.880143	0.610104	0.507503	0.329186	1	0.929305	1.48931	0.794672	0.330724	0.140153	1	0.989048	0.965856	0.949902	0.895628	0.805251
YJL050W	MTR4	1	0.175938	0.409355	0.46128	0.29293	0.23863	1	0.682419	0.826641	0.450127	0.168137		1	0.882234	0.635895	0.57087	0.458858	0.326198
YJL069C	UTP18	1	0.403292	0.647537	0.417779	0.363786	0.311823	1	0.689109	0.815358	0.556182	0.445941	0.418101	1	0.948742	0.834829	0.772332	0.631862	0.491808
YJR002W	MPP10	1	0.352467	0.194769	0.161093	0.160809	0.2697	1	0.716395	0.896294	0.430299	0.18318	0.198702	1	0.972165	0.871616	0.798914	0.672251	0.551235
YKL009W	MRT4	1	0.95155	1.34121	1.25269	1.07267	0.775977	1	0.858871	0.588797	0.572237	0.543072	0.636357	1	0.99714	1.02738	1.06561	1.09008	1.02841
YKL172W	EBP2	1	0.43114	0.698643	0.514889	0.400713	0.360627	1	0.966463	0.241957	0.281483	0.107152	0.15384	1	0.973017	0.909305	0.874211	0.783229	0.666019
YKR024C	DBP7	1	0.579481	0.84261	0.435753	0.177589	0.144743	1	0.831894	0.477998	0.270854	0.214719	0.32546	1	0.980285	0.938904	0.904274	0.774689	0.598092
YKR060W	UTP30	1	7.57362	9.26018	5.26606	4.54259	1.02032	1	0.860665	0.858455	0.838597	0.950055	0.911683	1	1.60505	3.59973	4.37918	4.57144	3.58238
YLL008W	DRS1	1	0.27042	0.124956	0.138162	0.102854	0.170339	1	0.888022	1.05292	0.534594	0.183102	0.192427	1	0.971553	0.870143	0.799804	0.676456	0.54489
YLL035W	GRC3	1	1.33115	2.46759	1.78907	1.55045	1.15807	1	0.878949	1.01075	1.03875	1.11466	1.51073	1	1.01125	1.11435	1.19838	1.27306	1.28888
YLR002C	NOC3	1	0.46298	0.575427	0.347067	0.261825	0.380616	1	0.90444	1.08196	0.328587	0.244763	0.263923	1	0.974416	0.90264	0.851268	0.731603	0.612996
YLR022C	YLR022C	1	0.933024	0.705808	0.532925	0.547696	0.76524	1	0.636509	0.92612	0.741146	0.442386	0.627747	1	0.996444	0.964777	0.920106	0.828791	0.775907
YLR051C	YLR051C	1	0.461809	0.446146	0.307684	0.335317	0.395201	1	0.849369	0.745215	0.414849	0.194009	0.383558	1	0.910669	0.690625	0.571292	0.420689	0.384843
YLR106C	MDN1	1	1.46616	1.62221	1.37177	0.737619	0.284819	1	1.07936	0.960829	0.68099	0.720668	1.42979	1	1.03213	1.14734	1.20452	1.15329	0.890761
YLR145W	YLR145W	1	1.30003	1.15759	0.806428	0.792292	0.689468	1	0.964861	1.05811	0.611757	0.521672	1.02202	1	1.08684	1.17846	1.04548	0.837602	0.730246
YLR175W	CBF5	1	0.269349	0.246227	0.292463	0.27017	0.540989	1	0.84072	0.458566	0.107799	0.0741127	0.102818	1	0.979946	0.912606	0.869195	0.792461	0.724475
YLR186W	EMG1	1	0.604932	0.519699	0.263012	0.28233	0.355679	1	0.650889	0.254523	0.079825	0.171044	0.288728	1	0.96813	0.862816	0.771377	0.598422	0.474405
YLR196W	PWP1	1	0.0441077	0.056414	0.0508533	0.0727924	0.162049	1	0.769289	0.233703	0.077258	0.0721477	0.113708	1	0.934088	0.736507	0.623552	0.453308	0.321373
YLR197W	SIK1	1	0.240822	0.284251	0.19978	0.134723	0.281692	1	0.750761	0.555859	0.108218	0.0591867	0.0712695	1	0.986947	0.944177	0.914286	0.852025	0.778394
YLR276C	DBP9	1	0.145233	0.151726	0.136769	0.203904	0.341401	1	0.772354	0.667438	0.123673	0.0515641	0.144545	1	0.976155	0.897772	0.846071	0.756642	0.669718
YLR293C	GSP1	1	0.923796	1.36973	1.16417	1.54357	1.10319	1	0.768625	0.876497	0.817122	0.469876	0.316791	1	0.999632	1.00212	1.0053	1.01367	1.02396
YLR409C	UTP21	1	1.28791	1.18009	0.638866	0.183936	0.266747	1	1.04708	1.07783	1.1241	0.707893	0.906231	1	1.01257	1.04462	1.02971	0.903465	0.72089
YLR430W	SEN1	1	0.270985	0.421357	0.289849	0.413079	0.422265	1	0.844562	0.894365	0.563342	0.461534	0.657617	1	0.952234	0.823595	0.749595	0.635084	0.552364
YMR049C	ERB1	1	0.074508	0.0422102	0.0554554	0.0443767	0.229515	1	0.678703	0.679028	0.25163	0.0316874	0.105628	1	0.981026	0.916269	0.872346	0.791151	0.702865
YMR239C	RNT1	1	0.770539	0.698033	0.581932	0.526641	0.340056	1	1.20623	1.9409	1.4857	1.55298	1.04354	1	0.973628	0.888063	0.820823	0.695861	0.535227
YMR285C	NGL2	1	1.4682	0.9044	0.566571	0.530918	0.504517	1	1.01795	1.12188	0.947575	0.887964	0.939967	1	1.06404	1.10407	0.98492	0.752694	0.597949
YMR290C	HAS1	1	0.355933	0.257273	0.179157	0.166658	0.292322	1	0.847945	0.869493	0.477083	0.0537951	0.131109	1	0.993867	0.971187	0.953357	0.916838	0.872285
YMR302C	PRP12	1	4.10267	3.7545	2.47382	2.44145	1.71564	1	0.848861	1.20255	1.49297	1.84057	2.16414	1	1.16183	1.63781	1.8226	1.97283	1.99894
YNL061W	NOP2	1	0.251595	0.294573	0.222038	0.201672	0.230257	1	0.836403	0.64501	0.267891	0.0983168	0.134084	1	0.974263	0.893038	0.839524	0.73818	0.624261
YNL075W	IMP4	1	0.365322	0.540199	0.403541	0.313522	0.640904	1	0.845564	0.475837	0.284657	0.226612	0.308932	1	0.958844	0.852652	0.792974	0.667318	0.600351
YNL112W	DBP2	1	0.237755	0.264883	0.170864	0.258845	0.407979	1	0.716934	0.643726	0.465342	0.371126	0.370113	1	0.946716	0.789368	0.69336	0.54725	0.463918
YNL182C	IPI3	1	0.396661	0.54919	0.442041	0.4652	0.482482	1	0.853937	0.56035	0.356597	0.256945	0.329674	1	0.95093	0.827602	0.762962	0.655076	0.573452
YNL221C	POP1	1	0.686183	1.40396	1.11086	1.04247	0.728019	1	0.772424	0.921129	0.875518	0.883766	1.04371	1	0.985364	0.996186	1.02548	1.03614	0.990441
YNL222W	SSU72	1	1.39731	1.3509	0.868013	1.34762	1.51351	1	0.980198	1.37936	0.923873	1.08213	1.51118	1	1.035	1.12943	1.1233	1.12448	1.27601
YNL232W	CSL4	1	0.647571	0.724006	0.574413	0.608238	0.574733	1	1.09942	1.17733	0.49466	0.376929	0.456954	1	0.954855	0.851629	0.790432	0.691012	0.627056
YNL282W	POP3	1	2.99082	4.02916	2.76686	1.87959	0.562839	1	1.38939	3.13716	3.91622	3.35879	2.67336	1	1.8772	3.50561	3.28745	2.16197	0.851946
YNL302C	RPS19B	1	0.448348	0.41139	0.391836	0.428625	0.44731	1	0.906727	1.06362	0.651351	0.254814	0.20383	1	0.960729	0.838294	0.76378	0.653844	0.566196
YNR054C	YNR054C	1	0.37485	0.456545	0.226908	0.168707	0.193732	1	0.886911	0.752221	0.411607	0.207341	0.227057	1	0.914869	0.712294	0.594081	0.382957	0.253145
YOL010W	RCL1	1	0.247011	0.170884	0.13075	0.291943	0.370867	1	1.03133	0.9177	0.682212	0.349302	0.27391	1	0.87637	0.556238	0.405511	0.295716	0.327654
YOL021C	DIS3	1	3.82439	2.60272	1.22997	1.0447	0.516881	1	0.52564	1.26182	0.941334	0.47234	0.647468	1	1.44293	2.22771	2.09921	1.52903	0.962132
YOL080C	REX4	1	0.515937	1.56295	3.51284	1.47937	1.38934	1	0.551801	0.180373	0.137375	0.227916	0.227276	1	0.992729	0.995385	1.05303	1.15752	1.18533
YOL142W	RRP40	1	0.955628	1.35321	1.16807	1.14032	0.794475	1	0.886832	0.944768	0.531061	0.376048	0.48569	1	0.998083	1.02137	1.04637	1.06777	1.03852
YOL144W	NOP8	1					0.443642	1	0.854374	1.60108	1.07171	0.428441	0.260232	1	0.974409	0.889539	0.833482	0.731742	0.647905
YOR001W	RRP6	1	0.390642	0.35427	0.245624	0.278198	0.43399	1	0.876264	0.506684	0.249642	0.144659	0.218619	1	0.970777	0.875421	0.808236	0.688486	0.592375
YOR004W	YOR004W	1	0.360924	0.253914	0.115928	0.186642	0.40473	1	0.701892	0.384346	0.199515	0.103067	0.196774	1	0.962403	0.83564	0.742993	0.587362	0.488361
YOR145C	YOR145C	1	0.616893	0.613141	0.375979	0.54715	0.730942	1	0.525928	0.229694	0.110337	0.0901505	0.159886	1	0.993341	0.970756	0.950237	0.909209	0.878135
YOR294W	RRS1	1	0.190728	0.0515509	0.048308	0.137772	0.255698	1	0.794939	0.593767	0.303194	0.0666431	0.127362	1	0.918196	0.664911	0.518758	0.342159	0.268702
YOR310C	NOP58	1	0.263366	0.2586	0.213445	0.256007	0.314234	1	0.89478	0.467472	0.195713	0.0849302	0.10933	1	0.973246	0.886231	0.828419	0.727702	0.626466
YOR363C	PIP2	1	3.52791	3.05427	2.45549	2.28158	2.50576	1	1.04153	1.67843	1.72949	1.92791	2.08753	1	1.11753	1.45258	1.59914	1.76254	1.94441
YPL043W	NOP4	1	0.0979188	0.058455			0.073967	1	0.762755	0.242577	0.189527	0.0992638	0.142489	1	0.965173	0.850226	0.772733	0.63382	0.489635
YPL093W	NOG1	1	0.142046	0.202694	0.16118	0.24013	0.490238	1	0.671977	0.637196	0.325554	0.0508287	0.133981	1	0.92348	0.711636	0.599565	0.450005	0.415503
YPL211W	NIP7	1					0.951532	1	1.25118	0.789028	0.403534	0.430502	0.330022	1	0.929742	0.718213	0.597276	0.413066	0.454787
YPL217C	BMS1	1	0.127016	0.150715	0.124051	0.101069	0.199814	1	0.932148	0.977189	0.62149	0.166802	0.170179	1	0.875701	0.563552	0.424384	0.253447	0.19054
YPL235W	RVB2	1	3.07612	1.40763	0.610735	0.558327	0.48575	1	0.582236	0.780883	0.564913	0.231954	0.429868	1	1.22076	1.53979	1.40287	1.04483	0.753768
YPL266W	DIM1	1	2.98606	1.21449	0.88047	0.72979	0.633133	1	0.79009	0.347691	0.177947	0.235041	0.273332	1	1.09517	1.25103	1.22693	1.13375	1.00045
YPR016C	TIF6	1	0.775663	0.405681	0.274599	0.338476	0.513358	1	0.866272	0.722012	0.466463	0.203551	0.225669	1	0.963234	0.776456	0.613259	0.431284	0.440691
YPR104C	FHL1	1	0.864451	0.715465	0.522392	0.577848	0.450794	1	0.819194	0.853668	0.79599	0.72775	0.862836	1	0.991555	0.949939	0.899875	0.803198	0.695796
YPR112C	MRD1	1	0.427349	0.458259	0.237784	0.259724	0.351053	1	0.859936	1.44941	0.586085	0.257404	0.338378	1	0.982662	0.927344	0.884165	0.793231	0.698651
YPR137W	RRP9	1	0.585099	0.55351	0.365884	0.374548	0.485803	1	0.893048	0.367008	0.37629	0.354172	0.538126	1	0.964379	0.85624	0.77471	0.626776	0.536817
YPR144C	UTP19	1	0.701346	0.462748	0.293124	0.230144	0.257501	1	0.823325	0.678451	0.3114	0.154881	0.224668	1	0.995568	0.974379	0.952422	0.902514	0.836926
